# Supplementary material
Source: MDPI journal article supplement (https://www.mdpi.com/2072-4292/12/1/116)
Supplement: s1 [file s1]

Article

# The Socio-Economic and Environmental Variables Associated with Hotspots of Infrastructure Expansion in South America

María José Andrade-Núñez <sup>1,\*</sup> and T. Mitchell Aide <sup>2</sup>

Supplementary information for The socio-economic and environmental variables associated with hotspots of infrastructure expansion in South America

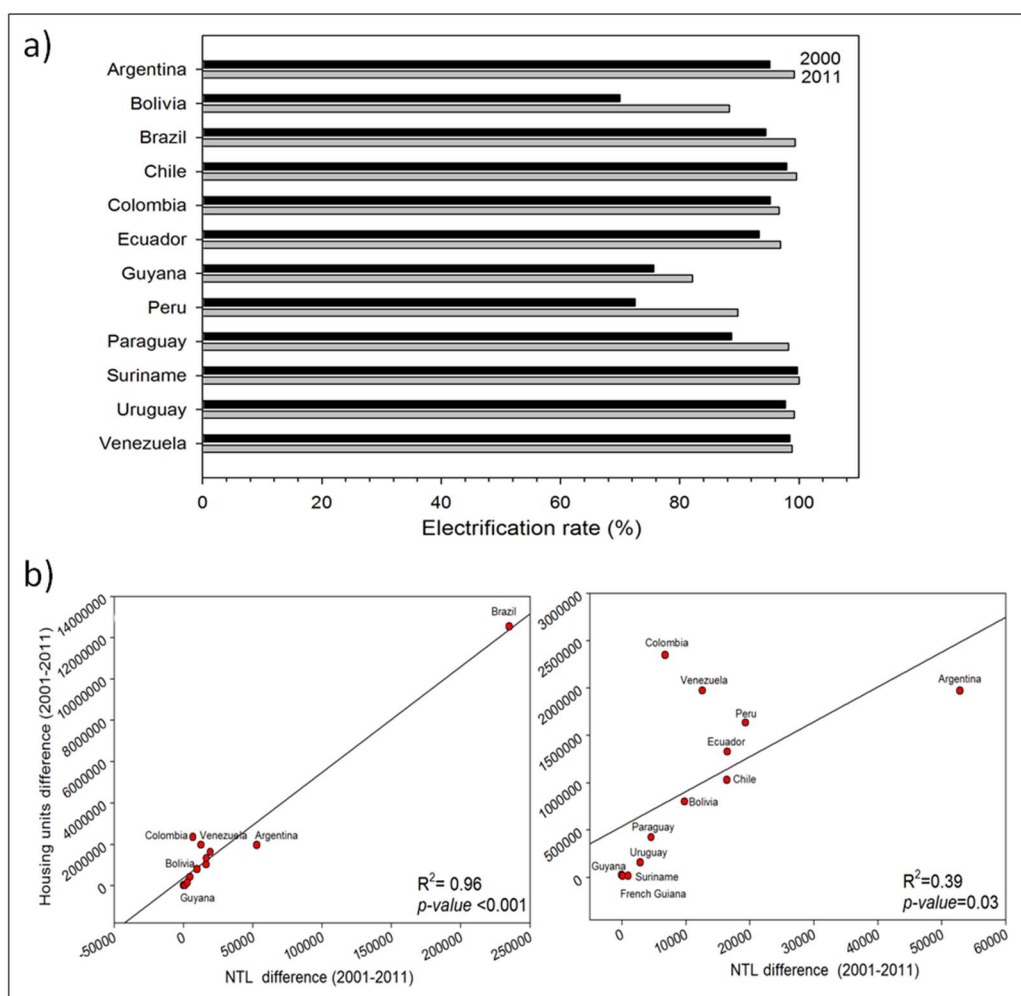

**Figure S1.** The use of night-time light (NTL) data as a proxy for infrastructure in South America. a) Electrification rate (%) (defined as the percentage of population with access to electricity ) in 2000 and 2011 for 12 countries in South America. b) Relationship between the difference in housing units and NTL data between 2001 and 2011 in South America countries: including Brazil (left), and excluding Brazil, due to its extreme value (right). Figures were extracted from Andrade-Núñez and Aide 2018.

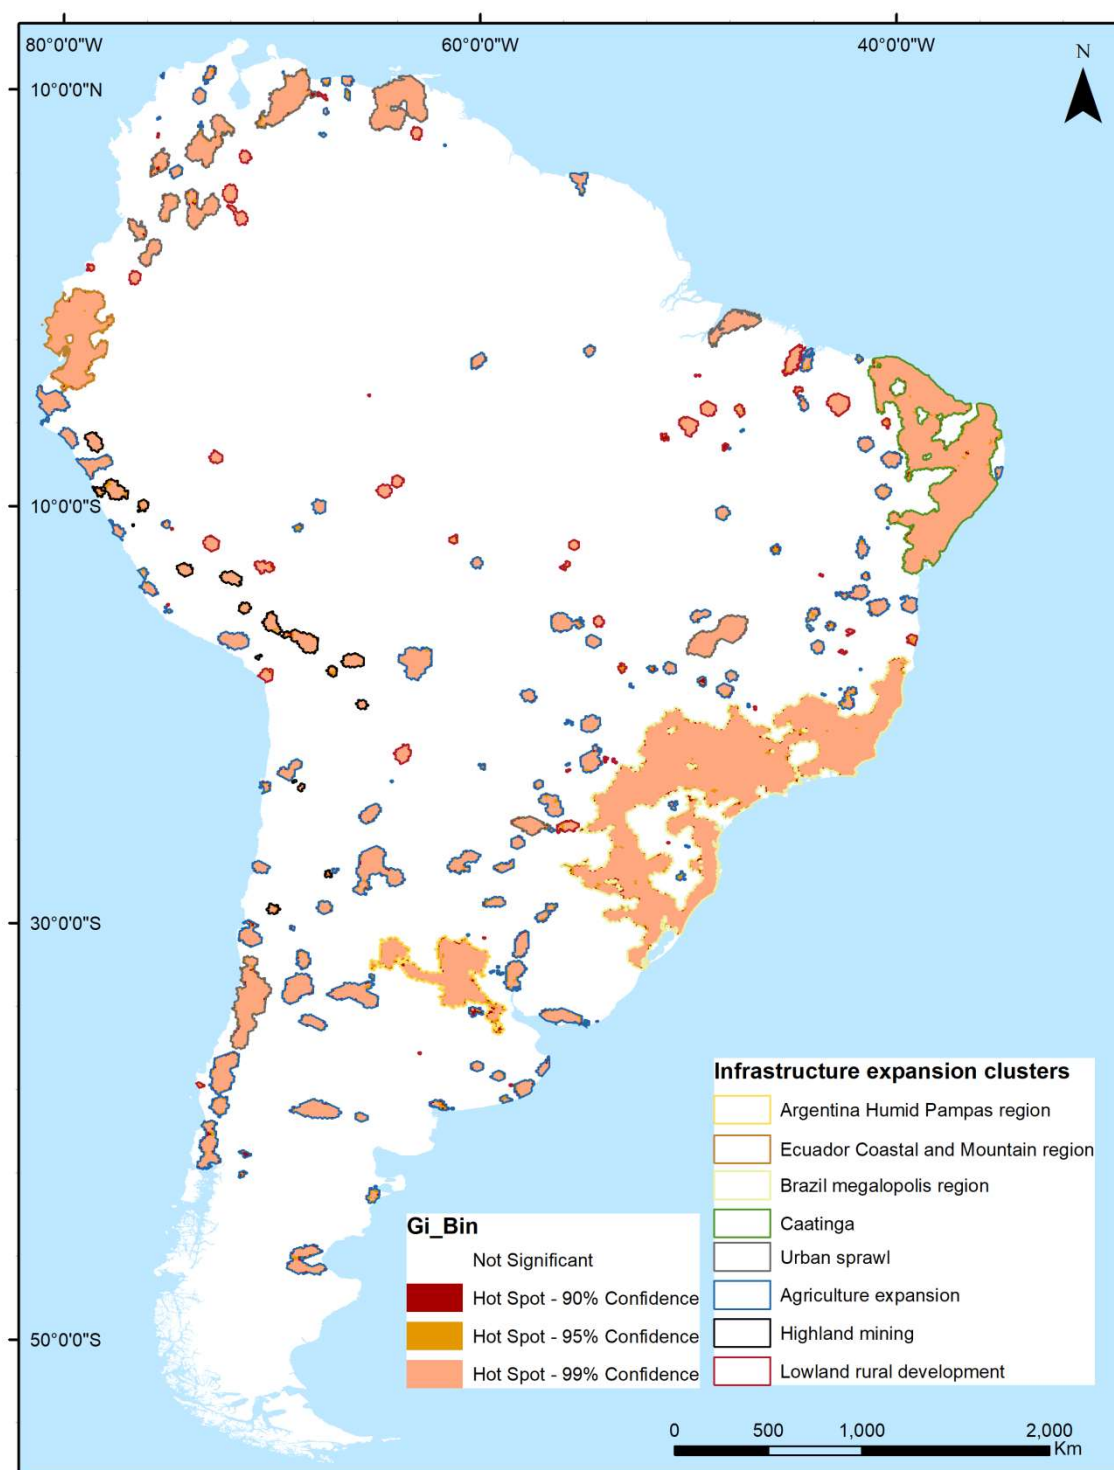

**Figure S2.** Hotspot areas of infrastructure expansion between 2001 and 2011 in South America. Optimized hotspot analysis results are showed as following: Gi\_Bin scores of: +3 (statistically significant at the 99 percent confidence level); +2 (statistically significant at the 95 percent confidence level); +1 (statistically significant at the 90 percent confidence level); and 0 (not statistically significant). Infrastructure expansion clusters are depicted.

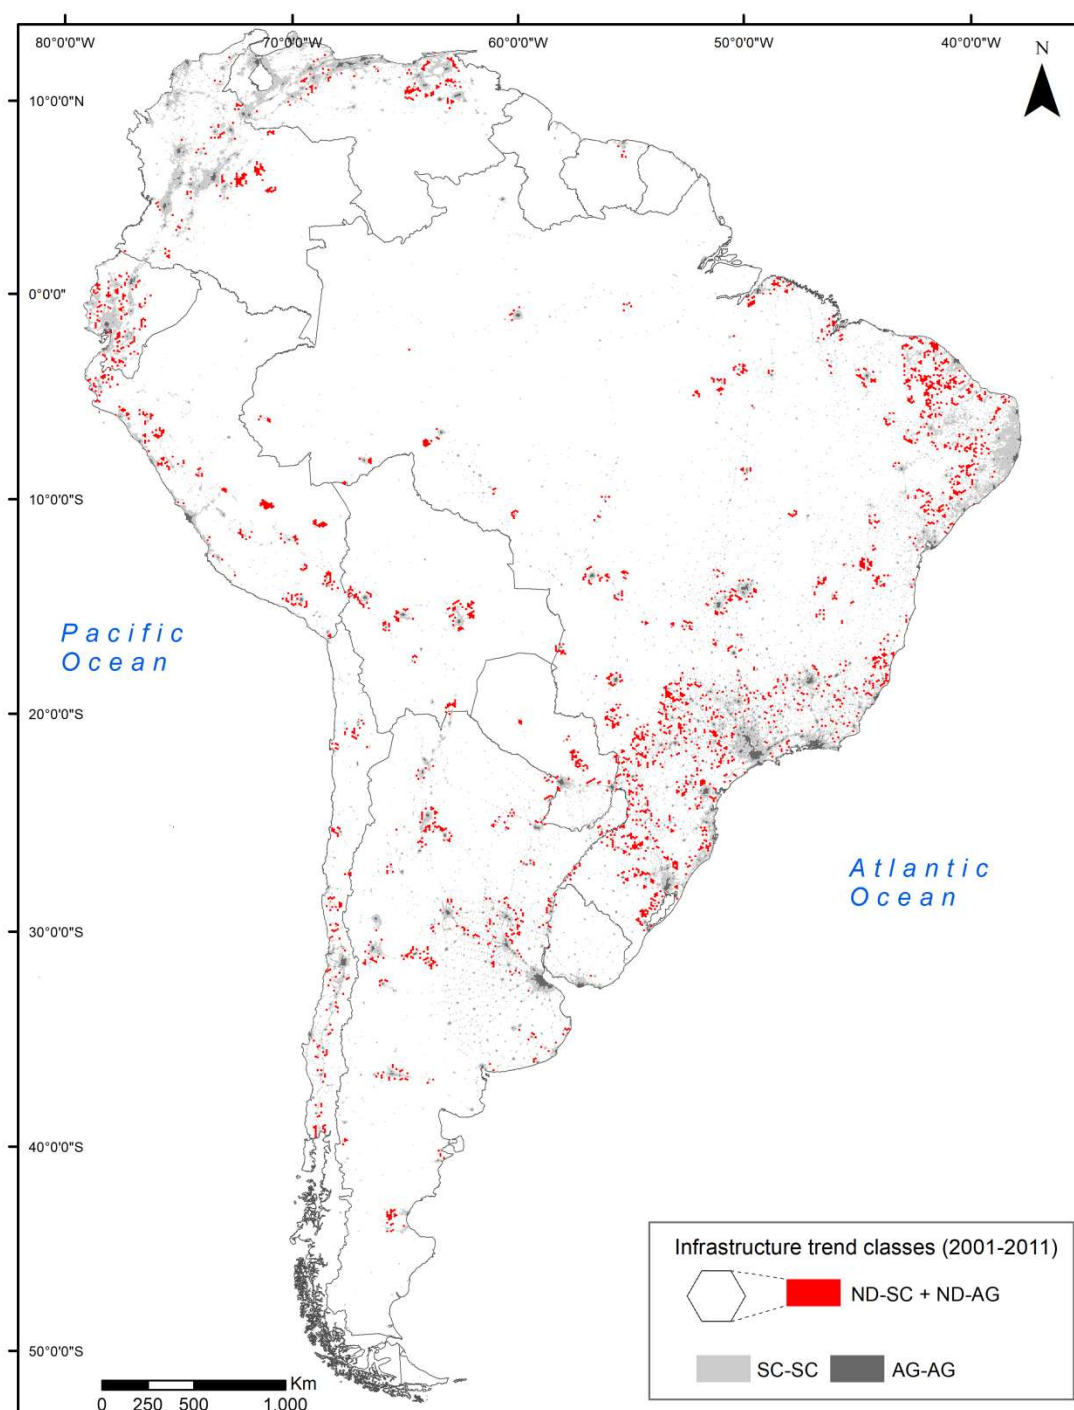

**Figure S3.** New infrastructure areas within hotspots of infrastructure expansion between 2001 and 2011 in South America. The red areas depict those hexagons (115 km<sup>2</sup>) that showed new infrastructure expansion (defined as the increase of infrastructure from no development to scattered (ND-SC), and from no-development to aggregated (ND-AG)), and had no scattered to scattered (SC-SC) or aggregated to aggregated (AG-AG) transition classes between 2001 and 2011.
